# Supplementary material for: Experimental Subarachnoid Hemorrhage Drives Catecholamine-Dependent Cardiac and Peripheral Microvascular Dysfunction
Source: PubMed Central journal article supplement (PMC7237757; doi:10.3389/fphys.2020.00402), 2020-05-13
Supplement: Presentation_1.pdf [file Presentation_1.pdf]

**SUPPLEMENTARY FIGURE 1**

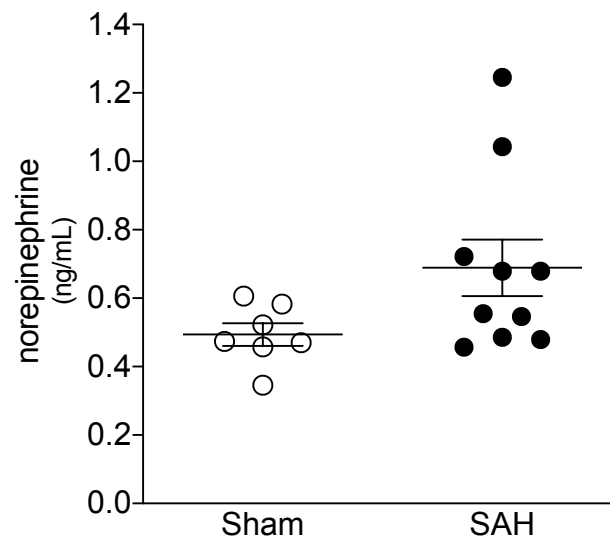

***Plasma norepinephrine levels mice with subarachnoid hemorrhage***

At 2-days post-subarachnoid hemorrhage (SAH) induction, circulating plasma norepinephrine levels are not different between SAH and sham-operated control mice (sham n=7, SAH n=10). The SAH group did not pass the Shapiro-Wilk normality test; the data are therefore compared with a non-parametric Mann-Whitney test (P=NS).

SUPPLEMENTARY FIGURE 2

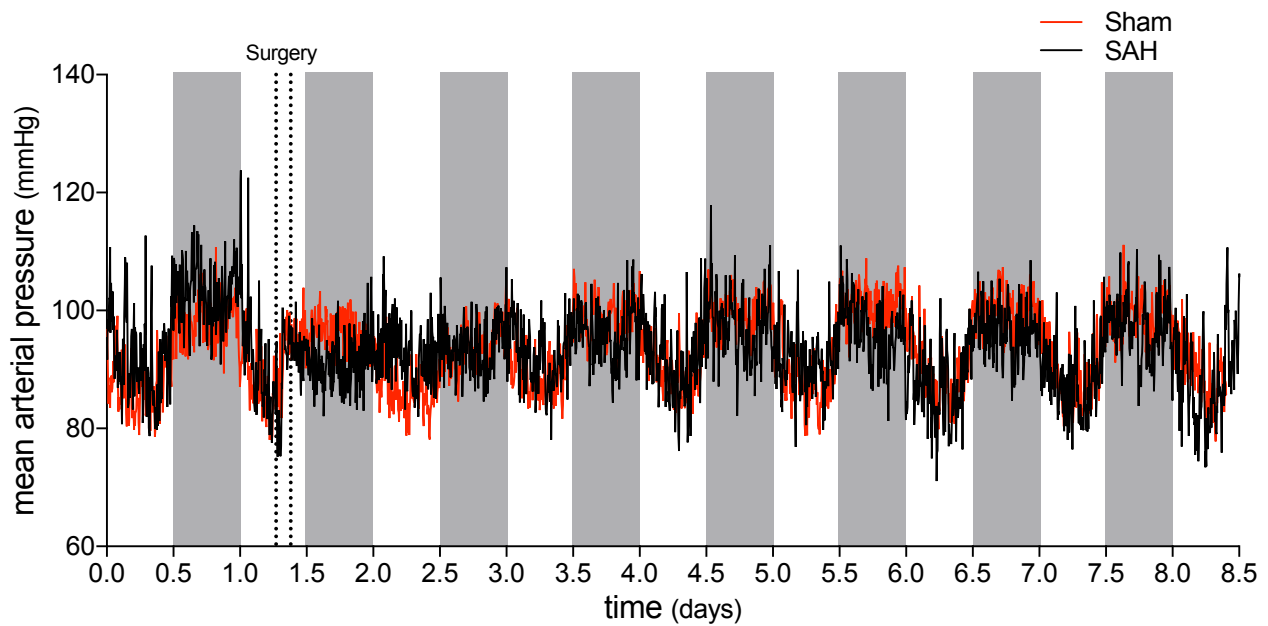

***Telemetric blood pressure measurements in mice with subarachnoid hemorrhage***

Telemetric mean arterial blood pressure measurements in conscious mice indicate that mice with subarachnoid hemorrhage (SAH; n=3) *do not* develop hypertension within 1-week post-SAH induction (sham n=5). Baseline measurements were collected 1 day prior to SAH or sham surgery; the surgical window is delineated by dotted vertical lines. White and gray shading indicate “lights on” and “lights off” periods, respectively.

SUPPLEMENTARY FIGURE 3

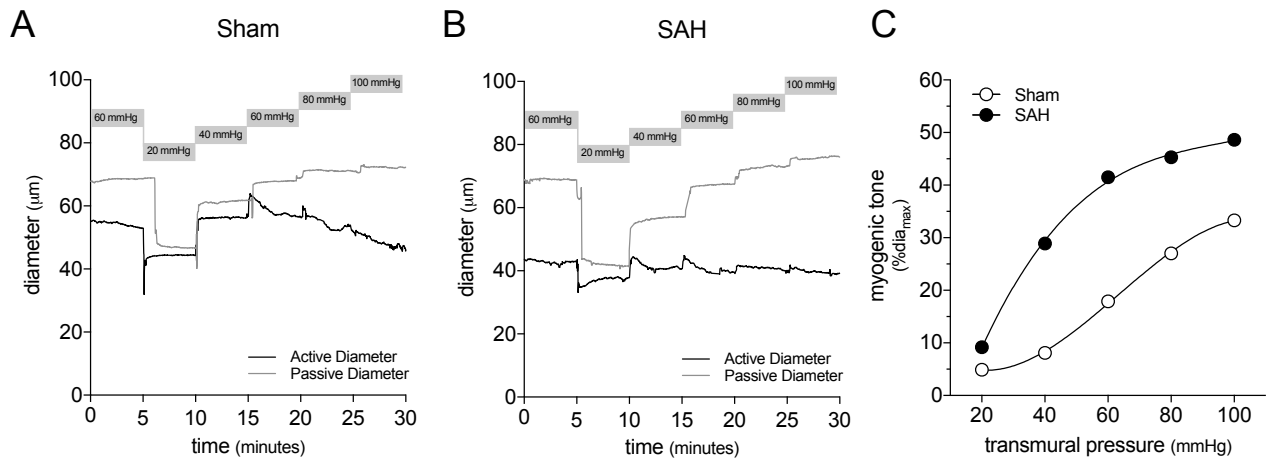

**Representative diameter measurements**

Stepwise increases in transmural pressure (20-100mmHg) are indicated in the boxes above the tracing. The active diameter tracing is acquired first (“dia<sub>active</sub>”; black line), followed by measurement of passive diameter under calcium-free conditions (“dia<sub>max</sub>”; gray line). Shown are representative diameter tracings from cremaster skeletal muscle resistance arteries isolated from (A) sham-operated mice (dia<sub>max</sub> = 68 μm) and (B) mice with subarachnoid hemorrhage (SAH; dia<sub>max</sub> = 68 μm). Myogenic tone is calculated as the percent constriction in relation to the maximal diameter at each respective transmural pressure: tone (% of dia<sub>max</sub>) = [(dia<sub>max</sub>-dia<sub>active</sub>)/dia<sub>max</sub>] $\times$ 100. **Panel C** displays the calculated myogenic tone measures for the arteries displayed in **Panels A and B**.

**SUPPLEMENTARY FIGURE 4**

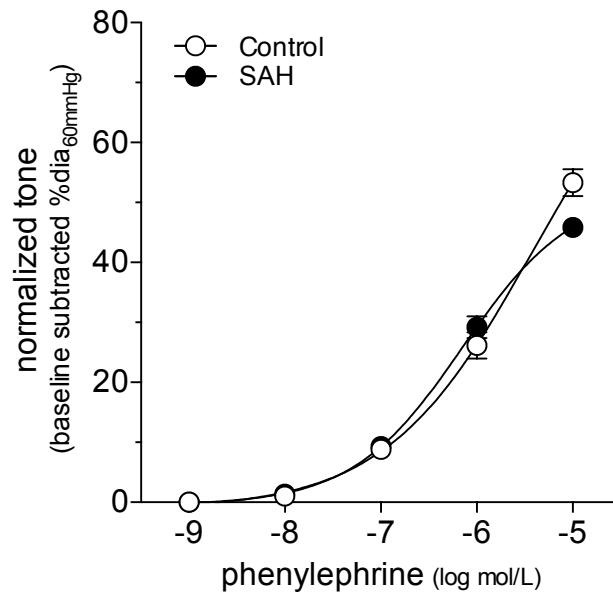

***Baseline-normalized phenylephrine responses mice with subarachnoid hemorrhage***

When baseline tone is normalized, phenylephrine-stimulated vasoconstriction in cremaster skeletal muscle resistance arteries isolated from mice with subarachnoid hemorrhage (SAH; at 2 days post-induction) are not different from sham-operated controls. Data were statistically compared with a 2-way ANOVA (P=N.S.; sham dia<sub>max</sub>: 78±2 μm, n=26; SAH 78±2 μm, n=22).

**SUPPLEMENTARY FIGURE 5**

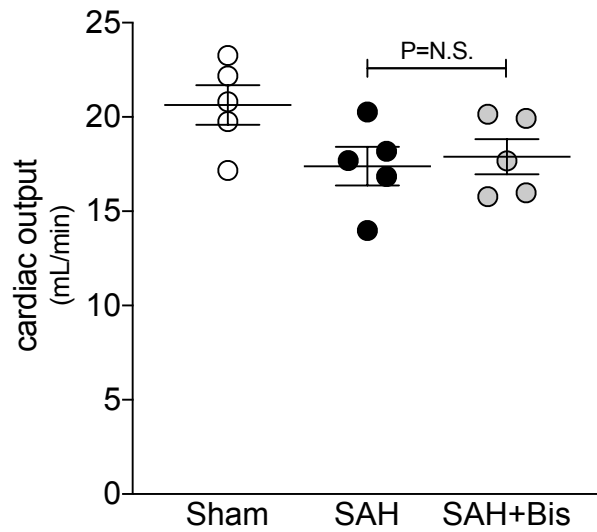

***Post-operative bisoprolol treatment does not protect cardiac function following subarachnoid hemorrhage***

When delivered immediately following experimental subarachnoid hemorrhage (SAH) induction, bisoprolol treatment (Bis; twice daily for 2 days with i.p. injections; 10 mg/kg initial pre-operative dose followed by 5 mg/kg for all subsequent injections) does not prevent the reduction in cardiac output at 2-days post-SAH (n=5 for all groups). The SAH and SAH+Bis groups were statistically compared with a Student's t test (P=N.S.).

SUPPLEMENTARY FIGURE 6

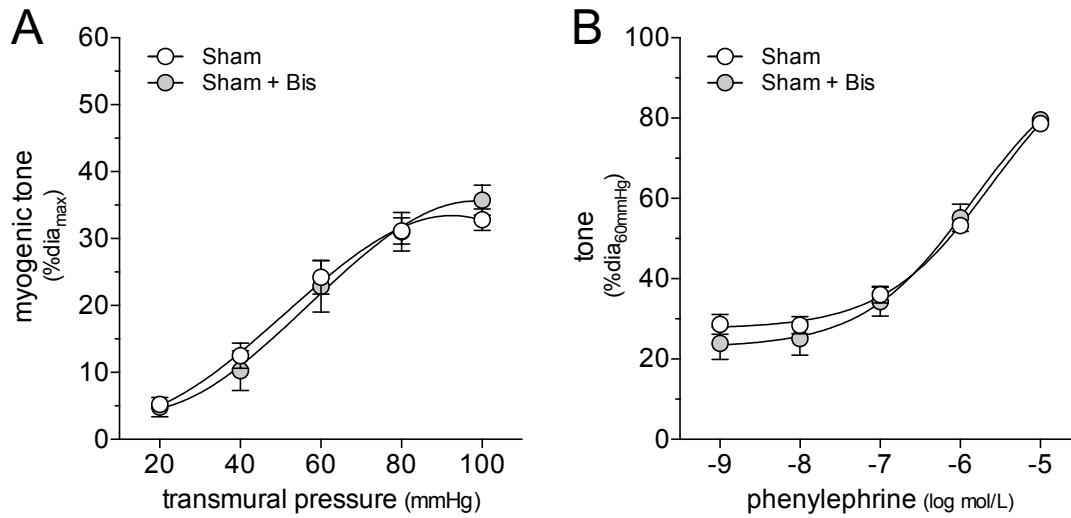

***Bisoprolol does not alter cremaster artery reactivity in sham animals***

In sham-operated mice, *in vivo* bisoprolol treatment (Bis; twice daily for 2 days with i.p. injections; 10 mg/kg initial pre-operative dose followed by 5 mg/kg for all subsequent injections) has no effect on (A) myogenic reactivity or (B) phenylephrine responses in cremaster skeletal muscle resistance arteries isolated at 2 days post-surgery/treatment (sham dia<sub>max</sub>: 80±2 μm, n=13; Sham+Bis dia<sub>max</sub>: 70±4 μm, n=9). The sham data in both panels are reproduced from Figure 2 for comparison to the Sham+Bis data. Data were statistically compared with a 2-way ANOVA (P=N.S.)

SUPPLEMENTARY FIGURE 7

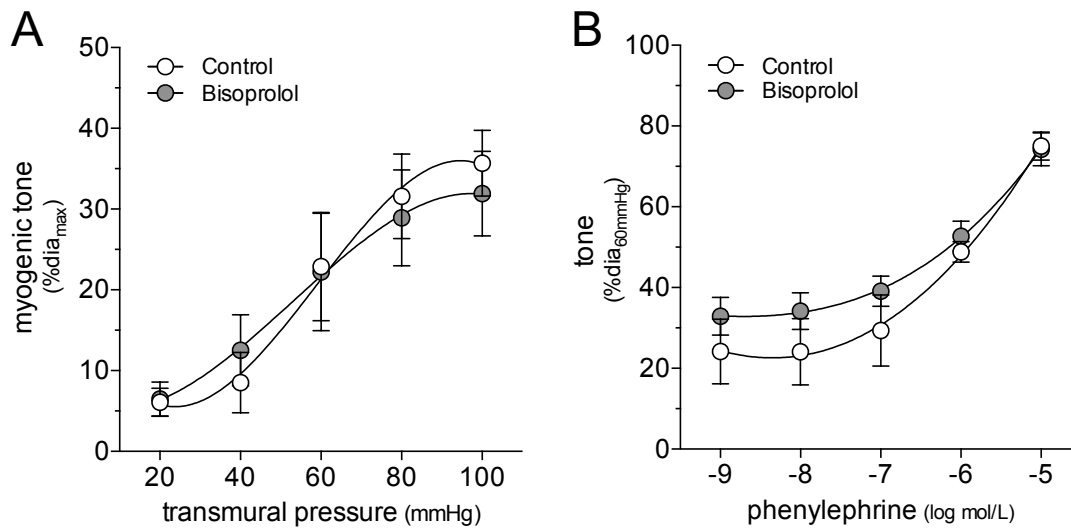

***Bisoprolol does not alter cremaster artery reactivity in vitro***

*In vitro*, bisoprolol (5  $\mu\text{mol/L}$  for 30 minutes) does not affect cremaster skeletal muscle resistance artery (A) myogenic reactivity or (B) phenylephrine responses ( $\text{dia}_{\text{max}} = 76 \pm 5$ ,  $n=4$ ). Data were statistically compared with a repeated measures 2-way ANOVA ( $P=N.S.$ ).

SUPPLEMENTARY FIGURE 8

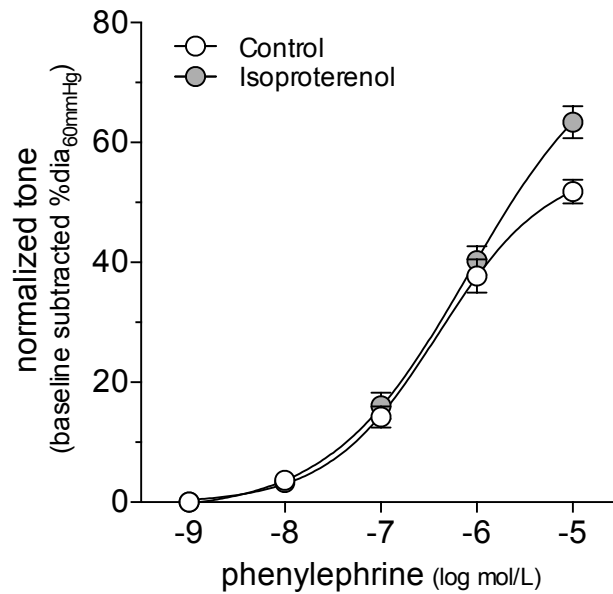

**Baseline-normalized phenylephrine responses for isoproterenol-treated mice**

When baseline tone is normalized, phenylephrine responses in cremaster skeletal muscle resistance arteries isolated from isoproterenol-treated mice (150 mg/kg/day i.p. for 2 days) are not different from saline-treated controls. Data were statistically compared with a 2-way ANOVA (P=N.S.; control dia<sub>max</sub>: 80±4 μm, n=8; isoproterenol dia<sub>max</sub>: 79±2 μm, n=8).



SUPPLEMENTARY FIGURE 9

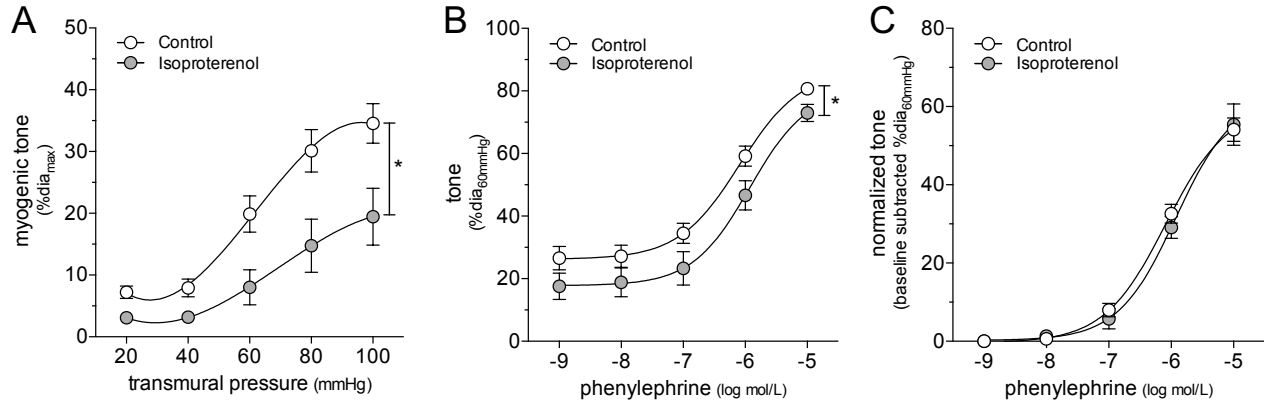

***Isoproterenol alters cremaster artery myogenic reactivity in vitro***

(A) *In vitro*, isoproterenol (1  $\mu$ mol/L for 30 minutes) attenuates cremaster skeletal muscle resistance artery myogenic reactivity. (B) Phenylephrine responses are also attenuated by isoproterenol treatment, due to a shift in basal tone. (C) When baseline tone is normalized, phenylephrine responses are unaffected by isoproterenol treatment. All data were statistically compared with a paired 2-way ANOVA (dia<sub>max</sub> = 73 $\pm$ 3, n=8). \* denotes P<0.05.

SUPPLEMENTARY FIGURE 10

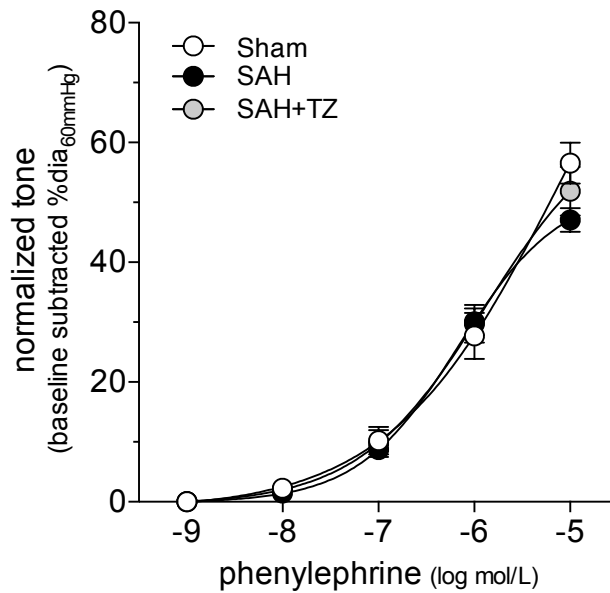

**Baseline-normalized phenylephrine responses for terazosin-treated mice**

When baseline tone is normalized, phenylephrine responses in cremaster skeletal muscle resistance arteries isolated from SAH mice are not different from those isolated from sham-operated controls. Normalized phenylephrine responses in cremaster skeletal muscle resistance arteries isolated from terazosin-treated mice (TZ; twice daily for 2 days with i.p. injections; 1 mg/kg initial pre-operative dose followed by 0.5 mg/kg for all subsequent injections) are also not different from sham-operated controls. Data were statistically compared with a 2-way ANOVA (P=N.S.; sham dia<sub>max</sub>: 76±3 μm, n=13; SAH dia<sub>max</sub>: 76±3 μm, n=12; SAH+TZ dia<sub>max</sub>: 74±2 μm, n=13).

SUPPLEMENTARY FIGURE 11

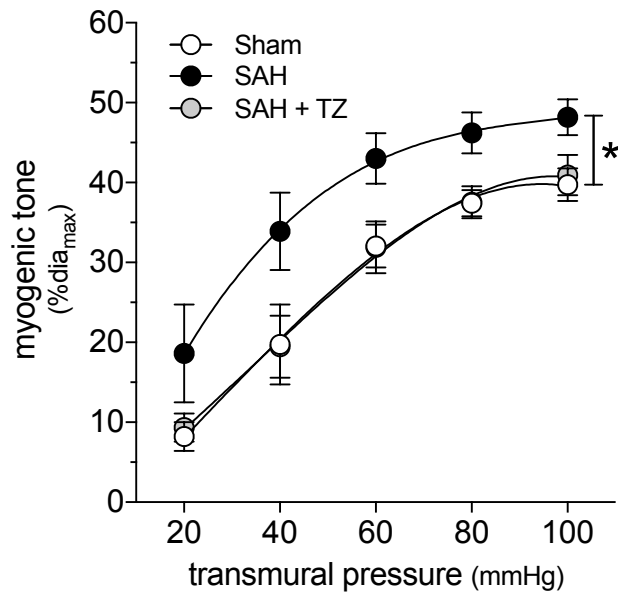

***Post-operative terazosin treatment normalizes myogenic reactivity following subarachnoid hemorrhage***

When delivered immediately following experimental subarachnoid hemorrhage (SAH) induction, terazosin (TZ; twice daily for 2 days with i.p. injections; 1 mg/kg initial dose followed by 0.5 mg/kg for all subsequent injections) normalizes the augmented myogenic vasoconstriction observed in cremaster skeletal muscle resistance arteries at 2-days post-SAH. Data were statistically compared with a 2-way ANOVA (sham dia<sub>max</sub>: 72±4 μm, n=5; SAH dia<sub>max</sub>: 76±6 μm, n=5; SAH+TZ dia<sub>max</sub>: 72±5 μm, n=6). \* denotes P<0.05.

SUPPLEMENTARY FIGURE 12

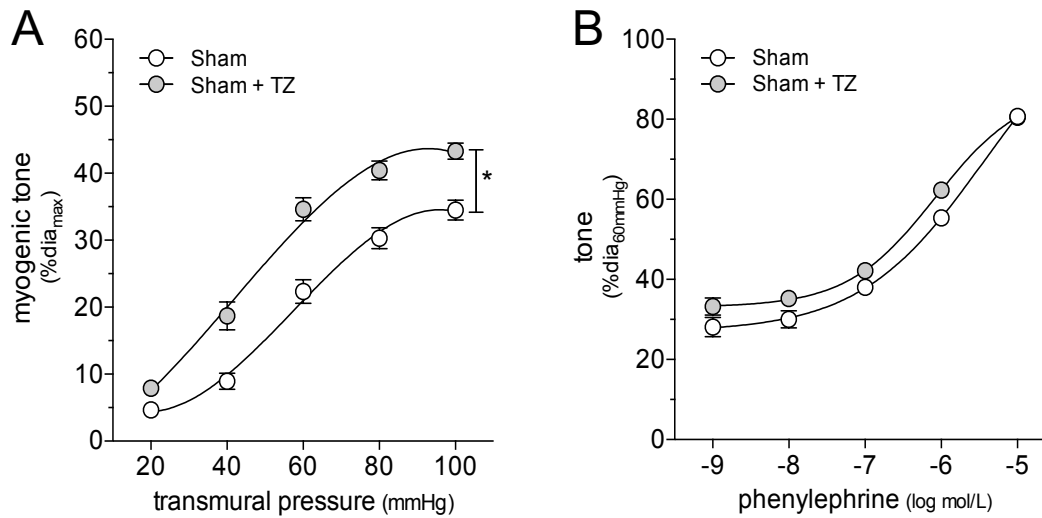

***Terazosin augments cremaster artery myogenic reactivity in sham animals***

In sham-operated mice, *in vivo* terazosin treatment (TZ; twice daily for 2 days with i.p. injections; 1 mg/kg initial pre-operative dose followed by 0.5 mg/kg for all subsequent injections) **(A)** augments myogenic reactivity in cremaster skeletal muscle resistance arteries isolated at 2 days post-surgery/treatment, but **(B)** does not alter phenylephrine responses (sham dia<sub>max</sub>: 75±2 μm, n=19; Sham+TZ dia<sub>max</sub>: 76±3 μm, n=26). \* denotes P<0.05.

SUPPLEMENTARY FIGURE 13

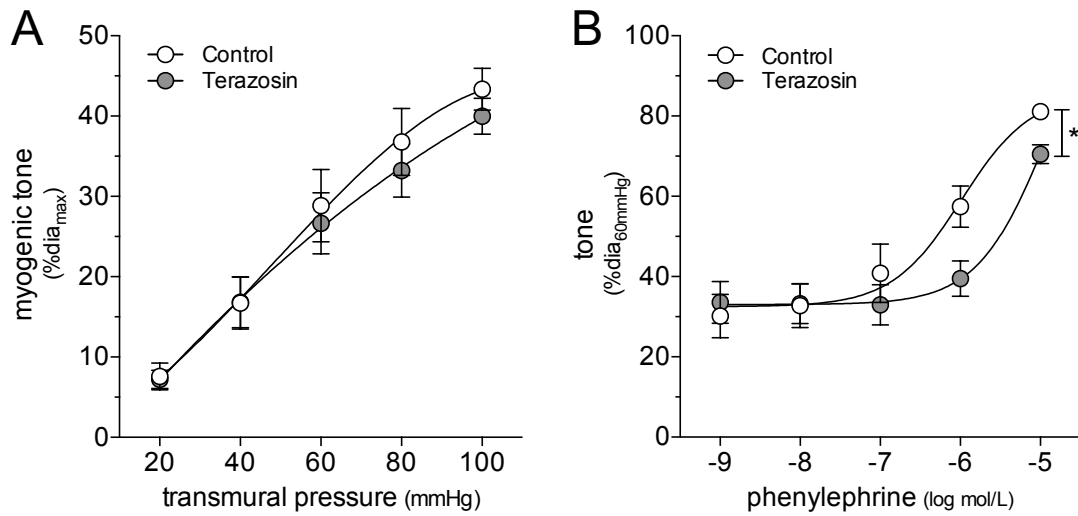

**Terazosin does not alter cremaster artery myogenic reactivity *in vitro***

(A) *In vitro*, terazosin (25nmol/L for 30 minutes) has no effect on cremaster skeletal muscle resistance artery myogenic reactivity. (B) However, *in vitro* terazosin treatment attenuates phenylephrine-stimulated vasoconstriction. Data were statistically compared with a repeated measures 2-way ANOVA ( $dia_{max} = 78 \pm 4$ ,  $n=6$ ). \* denotes  $P < 0.05$ .

SUPPLEMENTARY FIGURE 14

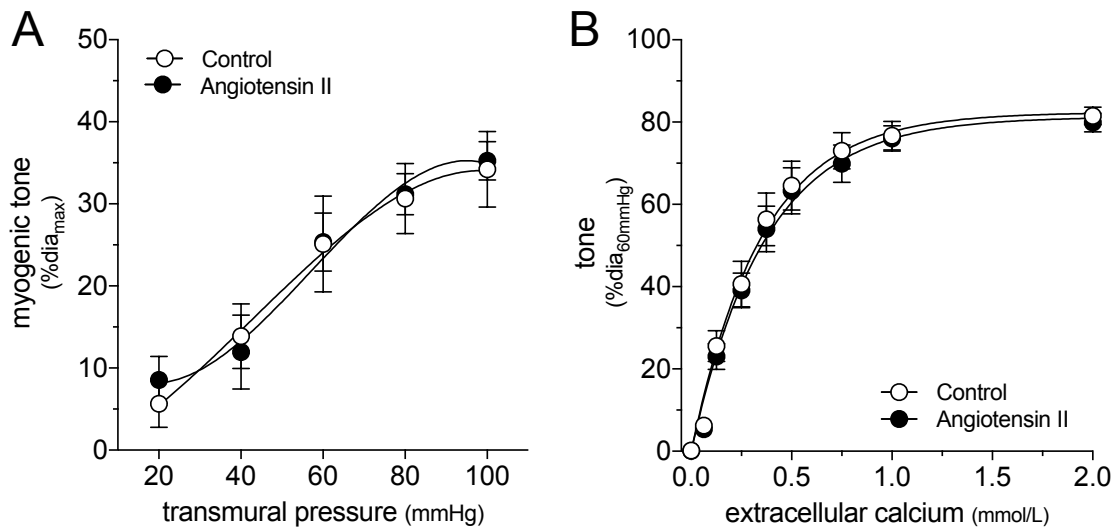

***In vitro* angiotensin II treatment does not alter cremaster artery myogenic reactivity or calcium sensitivity**

Cremaster skeletal muscle resistance arteries isolated from naïve mice were treated for 4 hours with either 10 nmol/L angiotensin II or control buffer *in vitro*. The arteries were then washed and assessed in normal buffer. Angiotensin treatment does not affect **(A)** myogenic tone or **(B)** calcium sensitivity (control dia<sub>max</sub>: 69±4 μm, n=5; angiotensin II dia<sub>max</sub>: 78±5 μm, n=6). Data were statistically compared with a 2-way ANOVA.

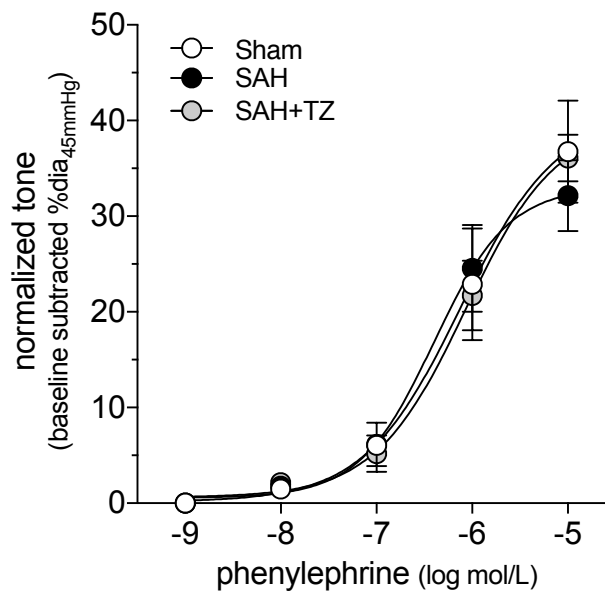

**Baseline-normalized phenylephrine responses in terazosin-treated cerebral arteries**

When baseline tone is normalized, phenylephrine responses in olfactory cerebral arteries isolated from SAH mice are not different from those isolated from sham-operated controls. Normalized phenylephrine responses in olfactory cerebral arteries isolated from terazosin-treated mice (TZ; twice daily for 2 days with i.p. injections; 1 mg/kg initial pre-operative dose followed by 0.5 mg/kg for all subsequent injections) are also not different from sham-operated controls. Data were statistically compared with a 2-way ANOVA (P=N.S.; sham  $dia_{max}$ :  $108 \pm 4 \mu m$ ,  $n=6$ , SAH  $dia_{max}$ :  $104 \pm 7 \mu m$ ,  $n=5$ , SAH+TZ  $dia_{max}$ :  $108 \pm 10 \mu m$ ,  $n=6$ ).

SUPPLEMENTARY FIGURE 16

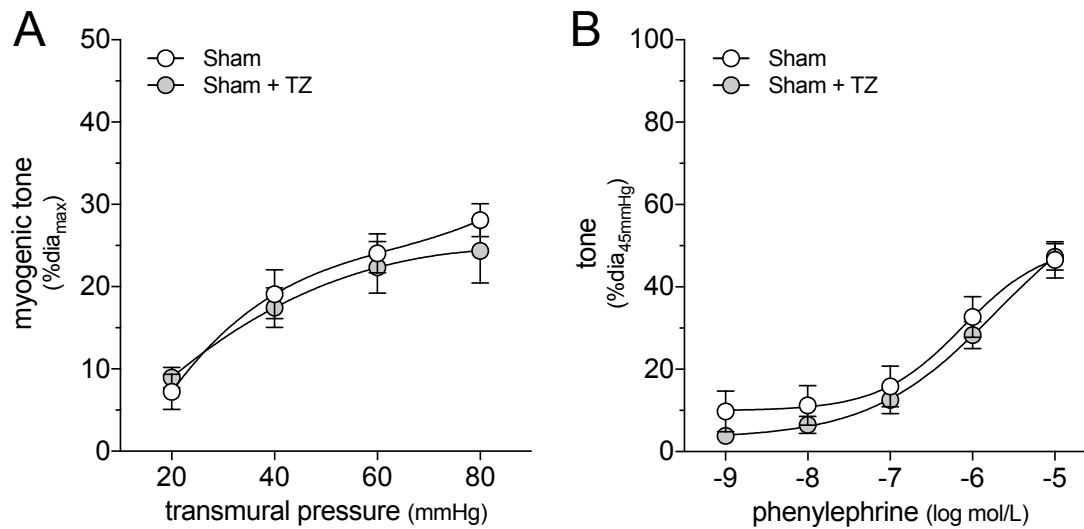

**Terazosin does not alter olfactory cerebral artery reactivity in sham animals.**

In sham-operated mice, *in vivo* terazosin treatment (TZ; twice daily for 2 days with i.p. injections; 1 mg/kg initial pre-operative dose followed by 0.5 mg/kg for all subsequent injections) has no effect on (A) myogenic reactivity (sham dia<sub>max</sub>: 108±4 μm, n=6; Sham+TZ dia<sub>max</sub>: 110±5 μm, n=5) or (B) phenylephrine responses (sham dia<sub>max</sub>: 110±4 μm, n=5; Sham+TZ dia<sub>max</sub>: 110±5 μm, n=5) in olfactory cerebral arteries isolated at 2 days post-surgery/treatment. The sham data in both panels are reproduced from *Figure 6*, for comparison to the Sham+TZ data. Data were statistically compared with a 2-way ANOVA (P=N.S.).



**SUPPLEMENTARY TABLE 1**

*Echocardiographic measures in mice with subarachnoid hemorrhage*

|                                      | <b>Sham</b>   | <b>SAH</b>          |
|--------------------------------------|---------------|---------------------|
| <b>Mouse Body Weight (g)</b>         | 22.9 ± 0.3    | 22.5 ± 0.3          |
| <b>Wall Thickness (mm)</b>           | 0.658 ± 0.016 | 0.654 ± 0.022       |
| <b>Systolic Diameter (mm)</b>        | 2.66 ± 0.06   | 2.68 ± 0.07         |
| <b>Diastolic Diameter (mm)</b>       | 3.87 ± 0.05   | 3.75 ± 0.06         |
| <b>Systolic Volume (μl)</b>          | 17.8 ± 1.0    | 18.0 ± 1.1          |
| <b>Diastolic Volume (μl)</b>         | 48.0 ± 1.6    | 44.2 ± 1.6          |
| <b>Fractional Shortening (%)</b>     | 31.3 ± 0.8    | 28.9 ± 0.9          |
| <b>LVEF (%)</b>                      | 64 ± 1        | 60 ± 1              |
| <b>Stroke Volume (μl)</b>            | 30.2 ± 0.9    | <b>26.2 ± 0.7 *</b> |
| <b>Heart Rate (min<sup>-1</sup>)</b> | 510 ± 7       | <b>477 ± 10 *</b>   |
| <b>Cardiac Output (ml/min)</b>       | 15.3 ± 0.4    | <b>12.4 ± 0.4 *</b> |

Data are means ± SEM (n=35 in both groups). \* denotes  $P < 0.05$  for an unpaired comparison (Student's t test). Acronyms: LVEF – Left ventricular ejection fraction; SAH – subarachnoid hemorrhage.

**SUPPLEMENTARY TABLE 2**

*Echocardiographic measures in bisoprolol-treated mice*

|                                      | <b>Sham</b>   | <b>SAH</b>          | <b>SAH+Bis</b> |
|--------------------------------------|---------------|---------------------|----------------|
| <b>Mouse Body Weight (g)</b>         | 22.3 ± 0.4    | 21.9 ± 0.5          | 21.9 ± 0.5     |
| <b>Wall Thickness (mm)</b>           | 0.665 ± 0.020 | 0.671 ± 0.033       | 0.653 ± 0.031  |
| <b>Systolic Diameter (mm)</b>        | 2.46 ± 0.05   | 2.61 ± 0.09         | 2.49 ± 0.10    |
| <b>Diastolic Diameter (mm)</b>       | 3.68 ± 0.05   | 3.65 ± 0.08         | 3.68 ± 0.10    |
| <b>Systolic Volume (μl)</b>          | 15.3 ± 1.4    | 16.4 ± 1.7          | 14.2 ± 1.5     |
| <b>Diastolic Volume (μl)</b>         | 41.4 ± 2.1    | 39.7 ± 2.2          | 41.1 ± 2.8     |
| <b>Fractional Shortening (%)</b>     | 33.1 ± 1.3    | 28.4 ± 1.8          | 32.3 ± 2.1     |
| <b>LVEF (%)</b>                      | 64 ± 2        | 59 ± 3              | 66 ± 2         |
| <b>Stroke Volume (μl)</b>            | 26.1 ± 1.0    | 23.3 ± 1.3          | 26.9 ± 1.7     |
| <b>Heart Rate (min<sup>-1</sup>)</b> | 542 ± 10      | <b>485 ± 15 *</b>   | 512 ± 16       |
| <b>Cardiac Output (ml/min)</b>       | 14.2 ± 0.7    | <b>11.4 ± 0.8 *</b> | 14.6 ± 0.8     |

Data are means ± SEM (sham n=12; SAH n=11; SAH+Bis n=10). \* denotes  $P < 0.05$  for an unpaired comparison to the sham (ANOVA with Dunnett's post-test). Acronyms: Bis: – bisoprolol; LVEF – Left ventricular ejection fraction; SAH – subarachnoid hemorrhage.

**SUPPLEMENTARY TABLE 3**

*Echocardiographic measures in isoproterenol-treated mice*

|                                      | <b>Naïve</b>  | <b>Isoproterenol</b> |
|--------------------------------------|---------------|----------------------|
| <b>Mouse Body Weight (g)</b>         | 25.4 ± 0.5    | 24.9 ± 0.4           |
| <b>Wall Thickness (mm)</b>           | 0.662 ± 0.033 | 0.691 ± 0.030        |
| <b>Systolic Diameter (mm)</b>        | 3.07 ± 0.13   | 2.89 ± 0.99          |
| <b>Diastolic Diameter (mm)</b>       | 4.24 ± 0.11   | <b>3.87 ± 0.08 *</b> |
| <b>Systolic Volume (μl)</b>          | 23.1 ± 2.6    | 21.2 ± 1.6           |
| <b>Diastolic Volume (μl)</b>         | 60.5 ± 4.2    | <b>51.7 ± 1.7 *</b>  |
| <b>Fractional Shortening (%)</b>     | 27.7 ± 1.2    | 25.4 ± 1.5           |
| <b>LVEF (%)</b>                      | 62 ± 2        | 59 ± 3               |
| <b>Stroke Volume (μl)</b>            | 37.4 ± 2.5    | <b>30.5 ± 1.0 *</b>  |
| <b>Heart Rate (min<sup>-1</sup>)</b> | 477 ± 12      | 471 ± 11             |
| <b>Cardiac Output (ml/min)</b>       | 17.8 ± 0.9    | <b>14.4 ± 0.6 *</b>  |

Data are means ± SEM (naïve n=5; isoproterenol n=9). \* denotes  $P<0.05$  for an unpaired comparison (Student's t test). Acronym: LVEF – Left ventricular ejection fraction.

**SUPPLEMENTARY TABLE 4**

*Echocardiographic measures in terazosin-treated mice*

|                                      | <b>Sham</b>   | <b>SAH</b>          | <b>SAH+TZ</b>       |
|--------------------------------------|---------------|---------------------|---------------------|
| <b>Mouse Body Weight (g)</b>         | 23.9 ± 0.4    | 23.3 ± 0.3          | 23.8 ± 0.5          |
| <b>Heart Wall Thickness</b>          | 0.669 ± 0.029 | 0.684 ± 0.031       | 0.673 ± 0.025       |
| <b>Systolic Diameter</b>             | 2.74 ± 0.09   | 2.72 ± 0.10         | 2.80 ± 0.10         |
| <b>Diastolic Diameter</b>            | 3.93 ± 0.08   | 3.81 ± 0.10         | 3.82 ± 0.09         |
| <b>Systolic Volume</b>               | 18.2 ± 1.4    | 18.7 ± 1.8          | 21.0 ± 1.9          |
| <b>Diastolic Volume</b>              | 50.4 ± 2.2    | 46.6 ± 2.5          | 48.5 ± 2.6          |
| <b>Fractional Shortening</b>         | 30.6 ± 1.2    | 28.8 ± 1.0          | 26.9 ± 1.2          |
| <b>LVEF (%)</b>                      | 64 ± 2        | 61 ± 2              | <b>57 ± 2 *</b>     |
| <b>Stroke volume (μl)</b>            | 32.2 ± 1.3    | <b>27.9 ± 1.0 *</b> | <b>27.5 ± 1.7 *</b> |
| <b>Heart rate (min<sup>-1</sup>)</b> | 500 ± 9       | 480 ± 14            | <b>443 ± 16 *</b>   |
| <b>Cardiac Output (ml/min)</b>       | 16.0 ± 0.6    | <b>13.3 ± 0.4 *</b> | <b>12.0 ± 0.3 *</b> |

Data are means ± SEM (sham n=16; SAH n=16; SAH+TZ n=12). \* denotes  $P < 0.05$  for an unpaired comparison to the sham (ANOVA with Dunnett's post-test). Acronyms: TZ: – terazosin; LVEF – Left ventricular ejection fraction; SAH – subarachnoid hemorrhage.
